# Supplementary material
Source: MDPI journal article supplement (https://www.mdpi.com/2071-1050/11/14/3875)
Supplement: s1 [file s1]

# **Supplementary information for**

## **Anaerobic digestion of food waste with unconventional co-substrates for stable biogas production at high organic loading rates**

Swati Hegde and Thomas A. Trabold\*

Golisano Institute for Sustainability, Rochester Institute of Technology,  
190 Lomb Memorial Drive, Rochester, NY 14623 USA

\*Corresponding Author – Email: [tatasp@rit.edu](mailto:tatasp@rit.edu); Tel: 001-585-475-4696; Fax: 001-585-475-5250

**Table S1:** Components of mixed cafeteria food waste (CFW); n=4

| Components            | Mass fraction, % |
|-----------------------|------------------|
| Fruits and vegetables | 59.4 ± 3.2       |
| Meat                  | 14.3 ± 3.8       |
| Grains and cereals    | 23.0 ± 3.5       |

**Table S2:** Optimization to choose the ratio of CFW to co-substrates

| Experiment | OLR [gVS/L d] | % CFW | % Co-Substrate | Methane FW/<br>Methane Co-Digestion |
|------------|---------------|-------|----------------|-------------------------------------|
| CFW+Manure | 1.4           | 30    | 70             | 0.78                                |
|            | 1.4           | 50    | 50             | 0.76                                |
|            | 1.2           | 20    | 80             | 0.77                                |
|            | 1.4           | 70    | 30             | 1.35                                |
| CFW+Bread  | 1.4           | 90    | 10             | 1.30                                |
|            | 1.4           | 80    | 20             | 1.06                                |
|            | 1.4           | 70    | 30             | 1.15                                |
| CFW+paper  | 1.4           | 92    | 8              | 0.74                                |
|            | 1.4           | 85    | 15             | 0.64                                |
|            | 1.4           | 95    | 5              | 1.34                                |

**Table S3:** Experimental design for feeding CFW and co-substrates at different OLRs. The mass of CFW and co-substrates are in grams. If the weights of substrate and cosubstrates do not sum to 60g, the remaining amount comes from water.

\*\*OLR reduced to 3.5 gVSL<sup>-1</sup>d<sup>-1</sup> due to the reactor failure at 4.4 gVSL<sup>-1</sup>d<sup>-1</sup>

| OLR, gVSL <sup>-1</sup> d <sup>-1</sup> | R1       | R2       |          | R3       |          | R4       |         | R5       |         | R6       |          | Test duration (d) |
|-----------------------------------------|----------|----------|----------|----------|----------|----------|---------|----------|---------|----------|----------|-------------------|
|                                         | CFW (g)  | CFW      | AW       | CFW      | ED       | CFW      | WB      | CFW      | PN      | CFW      | CM       |                   |
| 1.4±0.2                                 | 11.6±0.3 | 9.2±0.4  | 30.6±0.8 | 11.5±0.1 | 48.3±6.1 | 8.4±0.23 | 1.5±0.1 | 9.6±0.1  | 0.5±0.0 | 10.1±0.0 | 4.1±0.4  | 25                |
| 2.8±0.1                                 | 23.2±0.1 | 19.2±0.2 | 42.1±1.4 | 23.1±0.2 | 37.6±0.7 | 15.1±0.1 | 2.4±0.2 | 11.3±0.3 | 1.1±0.0 | 19.6±0.2 | 8.2±0.1  | 21                |
| 4.4±0.1                                 | 36±0.1   | 34.4±0.7 | 26.1±0.9 | 36±0.0   | 24.1±0.1 | 23±0.2   | 3.8±0.0 | 17±0.3   | 1.7±0.0 | 29.8±0.8 | 13.6±0.8 | 14                |
| 5.5±0.1                                 | **       | 45.2±0.2 | 15.6±0.4 | 46.2±0.2 | 14.5±0.5 | 29.8±0.4 | 5.0±0.0 | 21.6±0.4 | 2.0±0.0 | 38.2±0.1 | 18.3±0.3 | 10*               |

**Table S4:** Observed hydraulic retention times at different OLRs. Small variations in HRT are attributed to sample preparation error and volume losses during feeding and withdrawal.

| OLR, gVSL <sup>-1</sup> d <sup>-1</sup> | HRT (d)  |          |          |          |          |          |
|-----------------------------------------|----------|----------|----------|----------|----------|----------|
|                                         | R1       | R2       | R3       | R4       | R5       | R6       |
| 1.4±0.2                                 | 31.7±0.4 | 31.3±0.4 | 31.5±0.4 | 32.8±0.5 | 32.4±1.2 | 32.1±0.7 |
| 2.8±0.1                                 | 33.4±0.4 | 33.3±0.7 | 33.2±0.4 | 32.7±0.7 | 32.2±0.8 | 33.5±0.3 |
| 4.4±0.1                                 | 29.7±0.3 | 29.5±1.0 | 29.9±0.1 | 29.6±0.4 | 30.9±0.4 | 29.5±1.2 |
| 5.5±0.1                                 | NA       | 29.8±0.2 | 29.5±0.2 | 30.1±2.1 | 30.9±0.7 | 29.5±0.2 |

**Table S5** - Digestate characteristics at OLR = 2.8 gVSL<sup>-1</sup>d<sup>-1</sup>

|               | R1   | R2   | R3   | R4   | R5   | R6   |
|---------------|------|------|------|------|------|------|
| TS, %         | 1.1  | 1.2  | 1.5  | 2.0  | 0.9  | 1.4  |
| C:N ratio     | 6.2  | 3.0  | 4.0  | 4.5  | 8.0  | 5.2  |
| Carbon, %     | 41   | 24.8 | 41.6 | 35.2 | 61.7 | 36.5 |
| Nitrogen, %   | 7.6  | 8.3  | 10.4 | 7.8  | 7.7  | 7.0  |
| Phosphorus, % | 1.53 | 0.7  | 1.5  | 1.4  | 0.9  | 1.3  |
| Potassium, %  | 3.44 | 6.7  | 4.0  | 2.1  | 2.5  | 3.1  |
| Magnesium, %  | 0.6  | 0.6  | 0.9  | 0.6  | 0.4  | 0.8  |
| Calcium, %    | 2.9  | 4.5  | 3.0  | 3.0  | 1.4  | 2.8  |
| Sodium, %     | 2    | 3.3  | 3.3  | 2.1  | 1.2  | 1.7  |
| Sulfur, %     | 1.1  | 0.6  | 1.6  | 0.9  | 0.5  | 0.7  |
| Iron, %       | 1.8  | 0.6  | 1.2  | 1.1  | 0.4  | 0.5  |

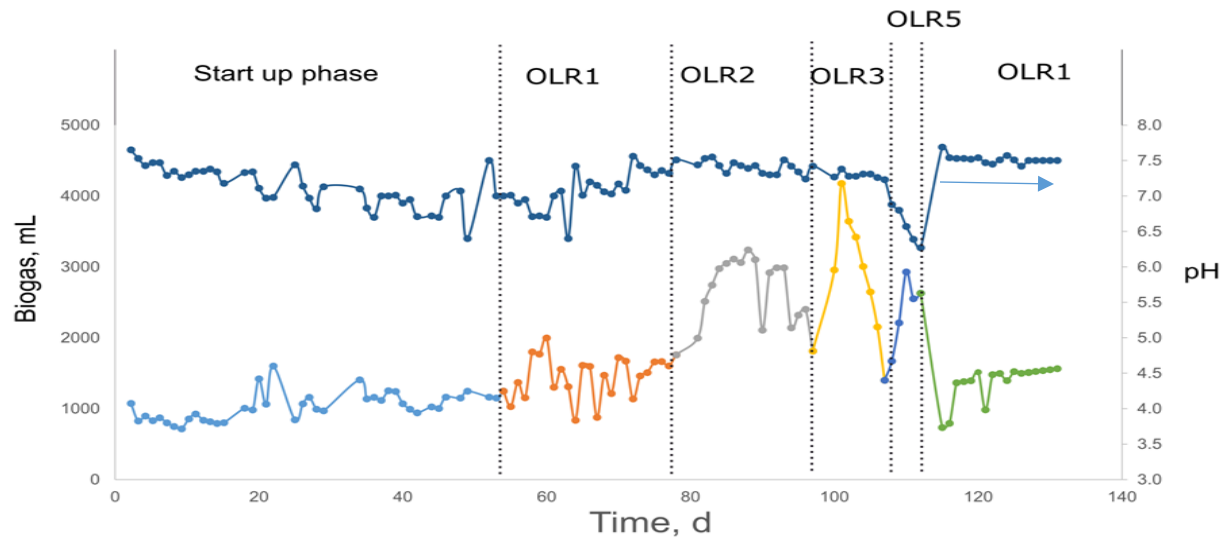

**Figure S1** - Sample kinetics of cafeteria food waste (CFW) digestion

OLR1=1.4 gVSL<sup>-1</sup>d<sup>-1</sup>; OLR2= 2.8 gVSL<sup>-1</sup>d<sup>-1</sup>; OLR3=4.4 gVSL<sup>-1</sup>d<sup>-1</sup>; OLR4=5.5 gVSL<sup>-1</sup>d<sup>-1</sup>; OLR5=3.5 gVSL<sup>-1</sup>d<sup>-1</sup>; OLR4 is not shown as this OLR was not studied for CFW due to process instability observed at OLR3

### Anaerobic digestion of food scraps with continuous mixing:

The start-up procedure for CSTRs was the same as for AMPTSII reactors. The CSTRs were continuously mixed at 60 rpm, and the temperature was maintained at 37°C using an embedded control thermocouple. The CFW showed a 20% and 27% lower average daily methane at 1.4 and 2.8 gVSL<sup>-1</sup>d<sup>-1</sup>, respectively, when compared with R1. The alkalinity, volatile acids and total ammoniacal nitrogen were also significantly higher compared to R1. The average hydrogen sulfide levels were nine times lower than R1 with intermittent mixing. There is literature on the effect of mixing on the composition of biogas. However, the mechanism by which mixing would reduce the H<sub>2</sub>S concentration is not clear. Continuous mixing is not recommended since it reduces biogas production.

However, In the case of excessive H<sub>2</sub>S in the biogas, mixing continuously for a fixed time could help reducing H<sub>2</sub>S levels. The parameters measured in this experiment are listed in Table S6.

**Table S6** - Process monitoring during digestion of mixed cafeteria food waste (CFW) and vegetable waste (VW) with continuous mixing;

OLR1=1.4 gVSL<sup>-1</sup>d<sup>-1</sup>; OLR2= 2.8 gVSL<sup>-1</sup>d<sup>-1</sup>

| Parameters                                                       | CFW       |           | VW        |           |
|------------------------------------------------------------------|-----------|-----------|-----------|-----------|
|                                                                  | OLR1      | OLR2      | OLR1      | OLR2      |
| pH                                                               | 7.6±0.1   | 7.5±0.1   | 7.5±0.1   | 7.3±0.2   |
| Avg. daily biogas, mL                                            | 1261±406  | 2241±384  | 1021±241  | 1402±296  |
| Biogas methane, %                                                | 60±4      | 60±1      | 56±4      | 50±5      |
| Biogas H <sub>2</sub> S, ppm                                     | 18±7      | 101±32    | 33±37     | 381±175   |
| Avg. daily methane, mL                                           | 746±193   | 1354±240  | 562±133   | 686±239   |
| SMY, mL CH <sub>4</sub> gVS <sup>-1</sup> d <sup>-1</sup>        | 260±58    | 253±22    | 198±48    | 125±45    |
| Total volatile acids, mg CH <sub>3</sub> COOH L <sup>-1</sup>    | 1089±514  | 886±168   | 1271±572  | 2197±1070 |
| Total alkalinity, mg CaCO <sub>3</sub> L <sup>-1</sup>           | 7300±1256 | 7410±1489 | 7471±1294 | 6230±356  |
| Total ammoniacal nitrogen, mg NH <sub>3</sub> -N L <sup>-1</sup> | 1840±56   | 1546±32   | 1624±29   | 1518±110  |
